# Supplementary material for: Applying the ARRIVE Guidelines to an In Vivo Database
Source: PubMed Central journal article supplement (PMC4439173; doi:10.1371/journal.pbio.1002151), 2015-05-20

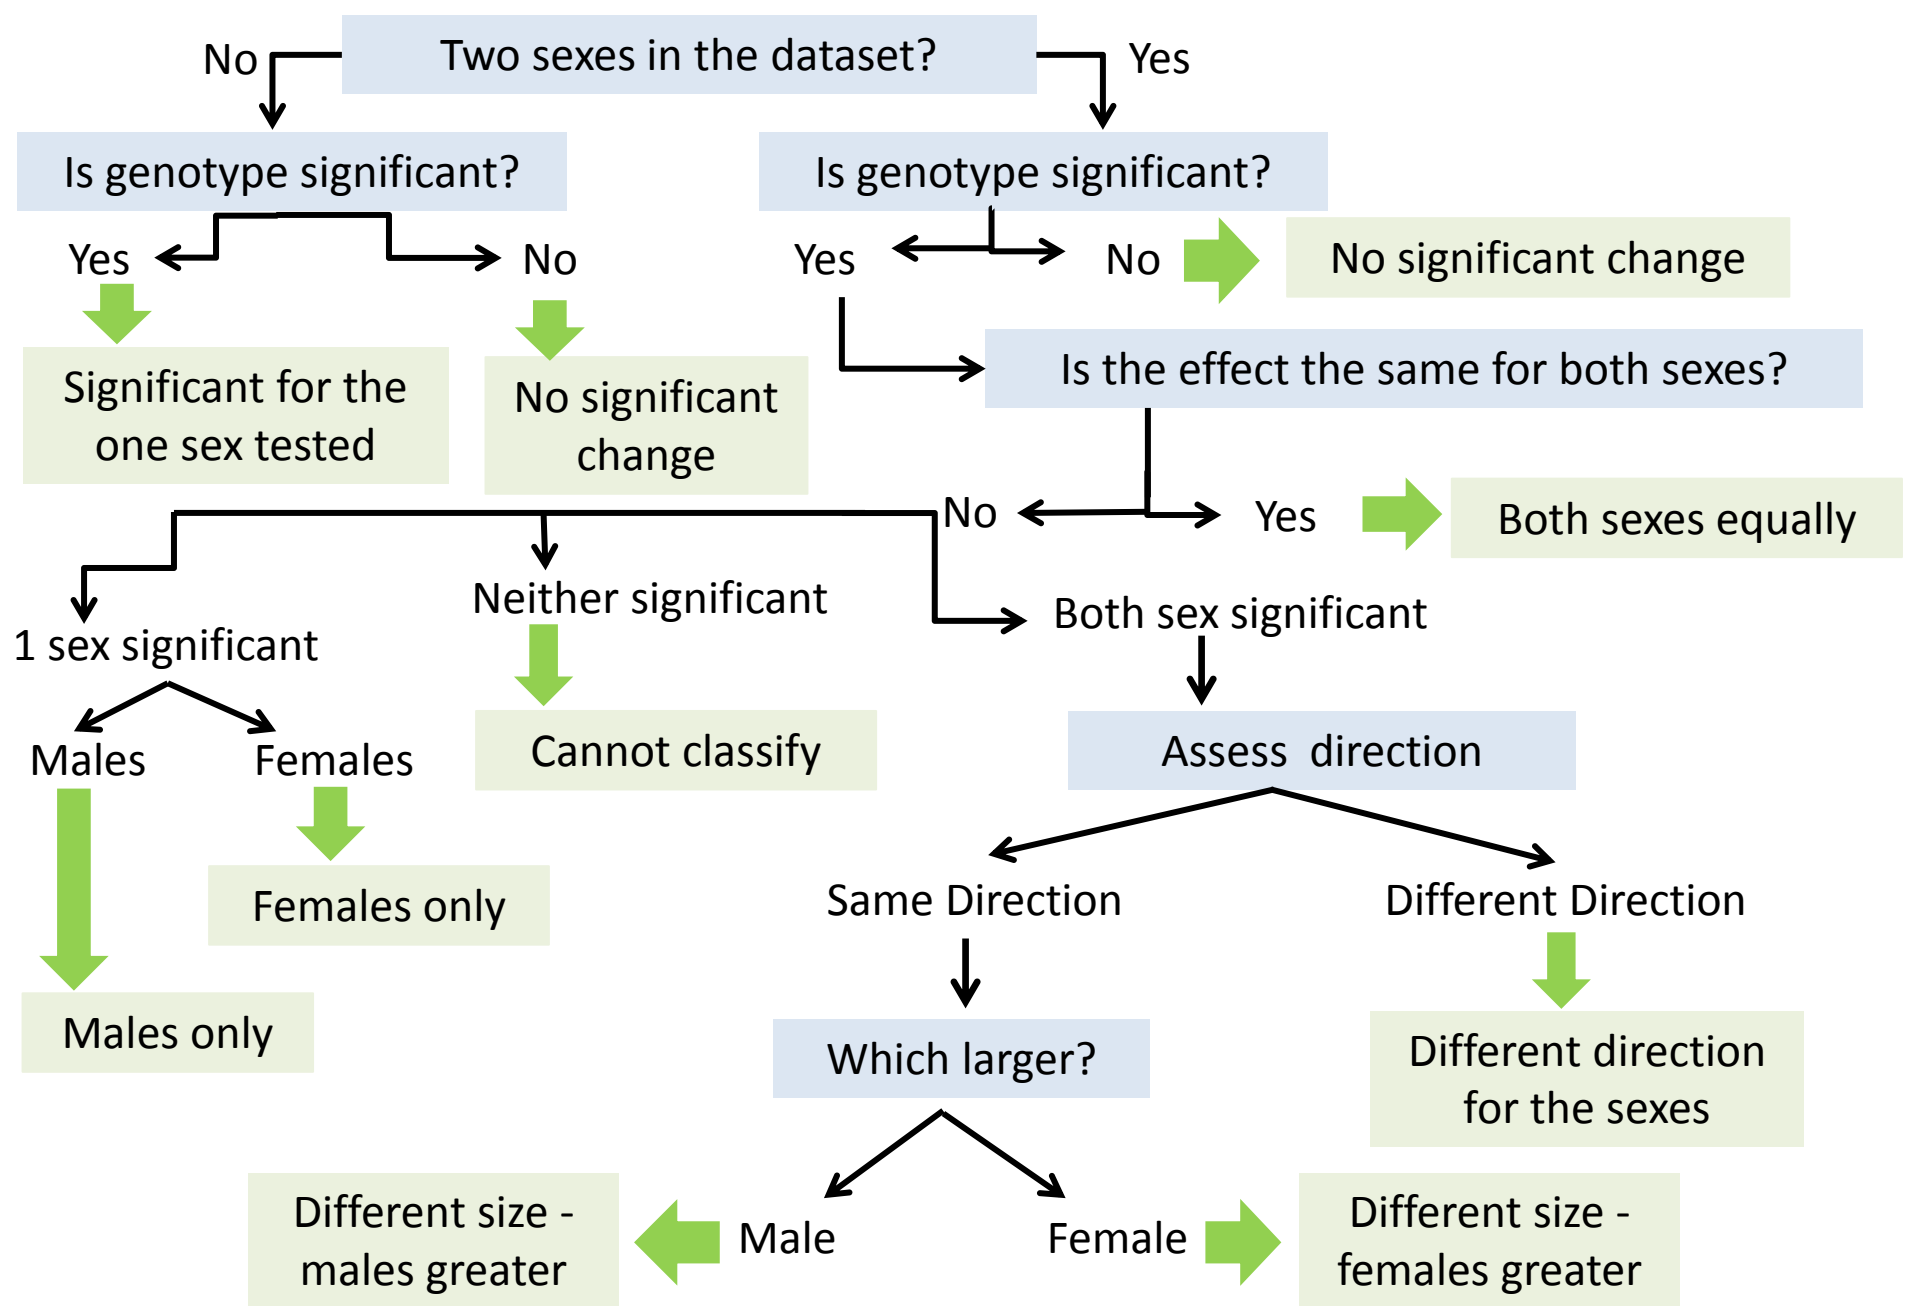

Supplement: pbio.1002151.s002.pdf [file pbio.1002151.s002.pdf]
